# Supplementary material for: Emricasan (IDN‐6556) Lowers Portal Pressure in Patients With Compensated Cirrhosis and Severe Portal Hypertension
Source: PubMed Central journal article supplement — Hepatology. 2018 Nov 26;69(2):717–28. doi: 10.1002/hep.30199 (PMC6587783; doi:10.1002/hep.30199), 2018-11-26
Supplement: HEP-69-717-s001.pdf [file HEP-69-717-s001.pdf]

**Supplemental Table 1. Baseline demographics and disease characteristics in the evaluable patient population (N=22), baseline HVPG < 10 mmHg (N=7), and baseline HVPG ≥ 10 mmHg (N=15).**

| <b>Median (min-max)</b>        | <b>Evaluable Subjects (n=22)</b> | <b>HVPG &lt; 10 mmHg (n=7)</b> | <b>HVPG ≥ 10 mmHg (n=15)</b> |
|--------------------------------|----------------------------------|--------------------------------|------------------------------|
| <b>Age (yrs)</b>               | 59 (49,80)                       | 57 (51,71)                     | 60 (49,80)                   |
| <b>Gender (%male)</b>          | 15 (68.2%)                       | 7 (100%)                       | 8 (53.3%)                    |
| <b>Race (%Caucasian)</b>       | 20 (90.9%)                       | 6 (85.7%)                      | 14 (93.3%)                   |
| <b>Etiology of cirrhosis</b>   |                                  |                                |                              |
| <b>NASH</b>                    | 13 (59.1%)                       | 5 (71.4%)                      | 8 (53.3%)                    |
| <b>HCV ± alcohol</b>           | 8 (36.4%)                        | 2 (28.6%)                      | 6 (40.0%)                    |
| <b>Alcohol alone</b>           | 1 (4.5%)                         | 0                              | 1 (6.7%)                     |
| <b>Child-Pugh Class A</b>      | 5 (5,6)                          | 5 (5,5)                        | 5 (5,6)                      |
| <b>Child-Pugh Class B</b>      | 7 (7,8)                          | 0                              | 7 (7,8)                      |
| <b>BMI (kg/m<sup>2</sup>)</b>  | 32.45 (17.9,44.9)                | 32.4 (27.6,37.3)               | 33 (17.9,44.9)               |
| <b>Systolic BP</b>             | 125.5 (108,171)                  | 125 (115,145)                  | 126 (108,171)                |
| <b>Heart rate</b>              | 76 (50,99)                       | 77 (65,92)                     | 76 (50,99)                   |
| <b>HVPG (mmHg)</b>             | 13.75 (5.5,32)                   | 7 (5.5,8)                      | 20.5 (10,32)                 |
| <b>cCK18 (U/L)</b>             | 189 (78,994)                     | 191 (126,442)                  | 187 (78,994)                 |
| <b>Caspase 3/7 (RLU)</b>       | 1959 (750,37428)                 | 1627 (1045,4970)               | 1997 (750,37428)             |
| <b>MELD score</b>              | 8 (6,15)                         | 8 (6,10)                       | 7 (6,15)                     |
| <b>Total bilirubin (mg/dL)</b> | 0.77 (0.31,3.08)                 | 0.6 (0.31,1.08)                | 0.81 (0.31,3.08)             |
| <b>INR</b>                     | 1.1 (0.9,1.6)                    | 1.2 (1,1.3)                    | 1.1 (0.9,1.6)                |
| <b>Albumin (g/dL)</b>          | 4.05 (2.7,4.9)                   | 4.4 (3.6,4.9)                  | 3.9 (2.7,4.5)                |
| <b>AST (U/L)</b>               | 31.5 (18,83)                     | 27 (18,79)                     | 35 (20,83)                   |
| <b>ALT (U/L)</b>               | 28.5 (12,89)                     | 36 (16,89)                     | 25 (12,61)                   |
